# Supplementary material for: Rapamycin extends life span of Rb1+/− mice by inhibiting neuroendocrine tumors
Source: publisher site journal article supplement (doi:10.18632/aging.100533), 2013-02-23
Supplement: Supplementary file [file aging-v5i2-100533-supplementary-material-SD1.pdf]

SUPPLEMENTARY DATA

| Table S1. Age (weeks) at treatment initiation |                           |      |                           |      |  |
|-----------------------------------------------|---------------------------|------|---------------------------|------|--|
|                                               | <i>Rb1</i> <sup>+/-</sup> |      | <i>Rb1</i> <sup>+/+</sup> |      |  |
| Diet Start Range                              | #Mice                     | %    | # Mice                    | %    |  |
| 7-8                                           | 7                         | 7.2  | 11                        | 11.2 |  |
| 8-9                                           | 49                        | 50.5 | 47                        | 48.0 |  |
| 9-10                                          | 40                        | 40.3 | 39                        | 48.0 |  |
| 12                                            | 1                         | 1.0  | 1                         | 1.0  |  |
| <b>Average</b>                                | 8.9                       |      | 8.8                       |      |  |
| <b>Youngest</b>                               | 7.0                       |      | 7.0                       |      |  |
| <b>Oldest</b>                                 | 12.0                      |      | 12.0                      |      |  |

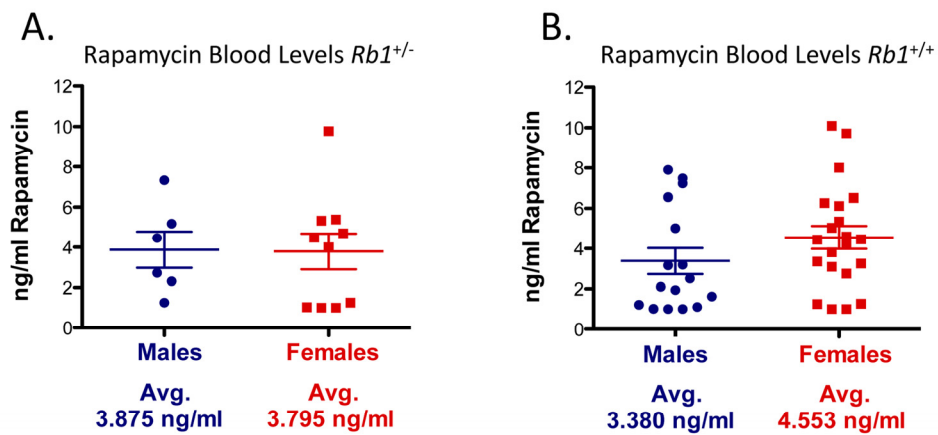

**Figure S1.** Rapamycin levels were quantified as described in Methods. The concentration of rapamycin was expressed as ng/ml of whole blood.
